# Supplementary material for: First-principles study of AlGaSi2X6 (X = S, Se, Te) monolayers: structural, electronic, transport and photocatalytic properties
Source: Royal Society of Chemistry journal article supplement (doi:10.1039/d6ra00973e), 2026-05-06
Supplement: d6ra00973e1.pdf [file d6ra00973e1.pdf]

## Supporting Information

### First-principles Study of AlGaSiS<sub>2</sub>X<sub>6</sub> (X = S, Se, Te) Monolayers: Structural, Electronic, Transport and Photocatalytic Properties

Thi H. Ho<sup>1,2,\*</sup>, Tuan V. Vu<sup>1,2\*</sup>, A. I. Kartamyshev<sup>1,2</sup>, Dat D. Vo<sup>1,2</sup>, Duy Khanh Nguyen<sup>1,2</sup> and  
Nguyen N. Hieu<sup>3,4</sup>

<sup>1</sup>Laboratory for Computational Physics, Institute for Computational Science and Artificial Intelligence, Van Lang University, Ho Chi Minh City, Vietnam

<sup>2</sup>Faculty of Mechanical, Electrical, and Computer Engineering, Van Lang School of Technology, Van Lang University, Vietnam

<sup>3</sup>Institute of Research and Development, Duy Tan University, Da Nang 550000, Vietnam

<sup>4</sup>Faculty of Natural Sciences, Duy Tan University, Da Nang 550000, Vietnam

\*Corresponding authors

Emails: [thi.hohuynh@vlu.edu.vn](mailto:thi.hohuynh@vlu.edu.vn) (T. H. Ho), [tuan.vu@vlu.edu.vn](mailto:tuan.vu@vlu.edu.vn) (Tuan V. Vu)

## Detailed Computational Methods

To further assess the thermodynamic stability of  $\text{AlGaSi}_2\text{X}_6$  monolayers, we considered the cohesive energy, defined as the energy difference between its total energy and the combined energies of its individual components, as follows:

$$E_{coh} = \frac{E_{Al} + E_{Ga} + 2E_{Si} + 6E_X - E_{tot}}{10}$$

where  $E_{tot}$  is the total energy of the relaxed system.  $E_{Al}$ ,  $E_{Ga}$ ,  $E_{Si}$ , and  $E_X$  are the total energy of isolated Ga, Si, S, Se or Te atom, respectively.  $E_{coh} < 0$  indicates favorable bonding strength.

A key elementary step in photocatalytic water splitting is the hydrogen evolution reaction (HER), which is governed by the adsorption of reaction intermediates  $\text{H}^*$  on catalytically active sites. To quantify the HER activity, we evaluated the Gibbs free energy of hydrogen adsorption  $\Delta G_H$  on the  $\text{AlGaSi}_2\text{X}_6$  monolayers, as follows[1-3]:

$$\Delta G_H = \Delta E_H + 0.24 \text{ eV}$$

$\Delta E_H$  is defined as:

$$\Delta E_H = E_{\text{AlGaSiX}_6 + \text{H}} - E_{\text{AlGaSiX}_6} - 0.5E_{\text{H}_2}$$

where  $E_{\text{AlGaSiX}_6 + \text{H}}$ ,  $E_{\text{AlGaSiX}_6}$ , and  $E_{\text{H}_2}$  denote the total energies of the H-adsorbed system, pristine monolayer, and isolated  $\text{H}_2$  molecule, respectively.

For the oxygen evolution reaction (OER), we evaluated the Gibbs free-energy change for each elementary proton-coupled electron-transfer step along the conventional four-step mechanism,

- (1)  $\text{H}_2\text{O}_{(l)} + * \rightarrow \text{OH}^* + (\text{H}^+ + \text{e}^-)$
- (2)  $\text{OH}^* \rightarrow \text{O}^* + (\text{H}^+ + \text{e}^-)$
- (3)  $\text{H}_2\text{O}_{(l)} + \text{O}^* \rightarrow \text{OOH}^* + (\text{H}^+ + \text{e}^-)$
- (4)  $\text{OOH}^* \rightarrow * + \text{O}_{2(g)} + (\text{H}^+ + \text{e}^-)$

Here,  $*$  denotes an empty surface adsorption site, and  $\text{OH}^*$ ,  $\text{O}^*$ , and  $\text{OOH}^*$  are adsorbed intermediates. All adsorption geometries were optimized using one adsorbate per surface supercell.

Within the computational hydrogen electrode (CHE) framework, the free-energy change of step  $i$  at an electrode potential  $U$  is computed as[4],

$$\Delta G_i = \Delta E_i + \Delta E_{ZPE} - T\Delta S_i - eU$$

where  $\Delta E_i$  is the DFT reaction energy,  $\Delta E_{ZPE}$  and  $\Delta S$  are the corresponding changes in zero-point energy and entropy, respectively. The term  $-eU$  accounts for the work associated with transferring one electron at potential  $U$ . In the CHE model, the chemical potential of the  $(H^+ + e^-)$  pair is referenced to  $\frac{1}{2}H_2$  at  $U = 0$  and  $pH = 0$ . The  $pH$  correction can be added when required.

To quantify in-plane transport, we estimated the intrinsic carrier mobility using the 2D Bardeen–Shockley deformation-potential (DP) formalism[5]. Small uniaxial strains  $\varepsilon_{uni}^{x/y}$  were applied along the  $x$  or  $y$  direction, and at each strain we recalculated the total energy  $E_{total}$  and the relevant band-edge energy  $E_{edge}$ . The strain–energy relation  $E_{tot}(\varepsilon)$  was sampled from -2% to 2% and fitted with a quadratic function, from which the in-plane 2D elastic modulus was obtained as

$$C_{2D}^{x/y} = \frac{1}{A_0} \frac{\partial^2 E_{total}}{\partial (\varepsilon_{uni}^{x/y})^2}$$

where  $A_0$  is the equilibrium cell area. Within the DP framework, the mobility along a given direction is then evaluated by,

$$\mu_{2D} = \frac{e\hbar^3 C_{2D}}{k_B T m^* m_d^* E_d^2}$$

with  $e$  the elementary charge,  $\hbar$  the reduced Planck constant,  $k_B$  the Boltzmann constant, and  $T$  the temperature. Here,  $m_{x/y}^*$  is the transport effective mass along  $x/y$ ,  $m_d^* = \sqrt{m_x^* m_y^*}$  is the density-of-states effective mass Effective masses, and  $E_d = \partial E_{edge} / \partial \varepsilon$  is the deformation-potential constant extracted from the linear slope of the band edge with strain. The effective masses were obtained from parabolic fitting of the band dispersion near the extrema,

$$m^* = \left( \frac{\hbar^2 \partial^2 E}{\partial k^2} \right)^{-1}$$

The theoretical solar-to-hydrogen (STH) conversion efficiency provides a convenient upper-bound metric for how effectively a semiconductor photocatalyst could transform incident sunlight into the chemical free energy stored in  $H_2$ . Following the widely used AM1.5G spectral-integration descriptor, we express the overall efficiency as the product of the light-absorption efficiency  $\eta_{abs}$  and the carrier-utilization efficiency  $\eta_{cu}$ [6]:

$$\eta_{STH} = \eta_{abs} \times \eta_{cu}$$

The absorption term  $\eta_{abs}$  measures the fraction of the solar power carried by photons energetic enough to be absorbed across the band gap,

$$\eta_{abs} = \frac{\int_{E_g}^{\infty} P(\hbar\omega) d(\hbar\omega)}{\int_0^{\infty} P(\hbar\omega) d(\hbar\omega)}$$

where  $P(\hbar\omega)$  denotes the AM1.5G solar spectral irradiance as a function of photon energy  $\hbar\omega$  and band gap  $E_g$  of photocatalyst.

The carrier-utilization efficiency accounts for the portion of the absorbed photon energy that can be converted into the Gibbs free energy required for overall water splitting:

$$\eta_{cu} = \frac{\Delta G_{H_2O} \int_E^{\infty} \frac{P(\hbar\omega)}{\hbar\omega} d(\hbar\omega)}{\int_{E_g}^{\infty} P(\hbar\omega) d(\hbar\omega)}$$

where  $\Delta G_{H_2O} = 1.23$  eV is the minimum free-energy cost per transferred electron under standard conditions. The lower photon-energy threshold  $E$  incorporates additional energetic losses associated with the kinetic overpotentials for HER  $\chi(H_2)$  and OER  $\chi(O_2)$ , through:

$$E = \begin{cases} E_g & \chi(H_2) \geq 0.2 \text{ and } \chi(O_2) \geq 0.6 \\ E_g + 0.2 - \chi(H_2) & \chi(H_2) < 0.2 \text{ and } \chi(O_2) \geq 0.6 \\ E_g + 0.6 - \chi(O_2) & \chi(H_2) \geq 0.2 \text{ and } \chi(O_2) < 0.6 \\ E_g + 0.8 - \chi(H_2) - \chi(O_2) & \chi(H_2) < 0.2 \text{ and } \chi(O_2) < 0.6 \end{cases}$$

Here, the commonly adopted reference values of 0.2 eV (HER) and 0.6 eV (OER) represent typical kinetic penalties used in theoretical screening of overall water-splitting photocatalysts.

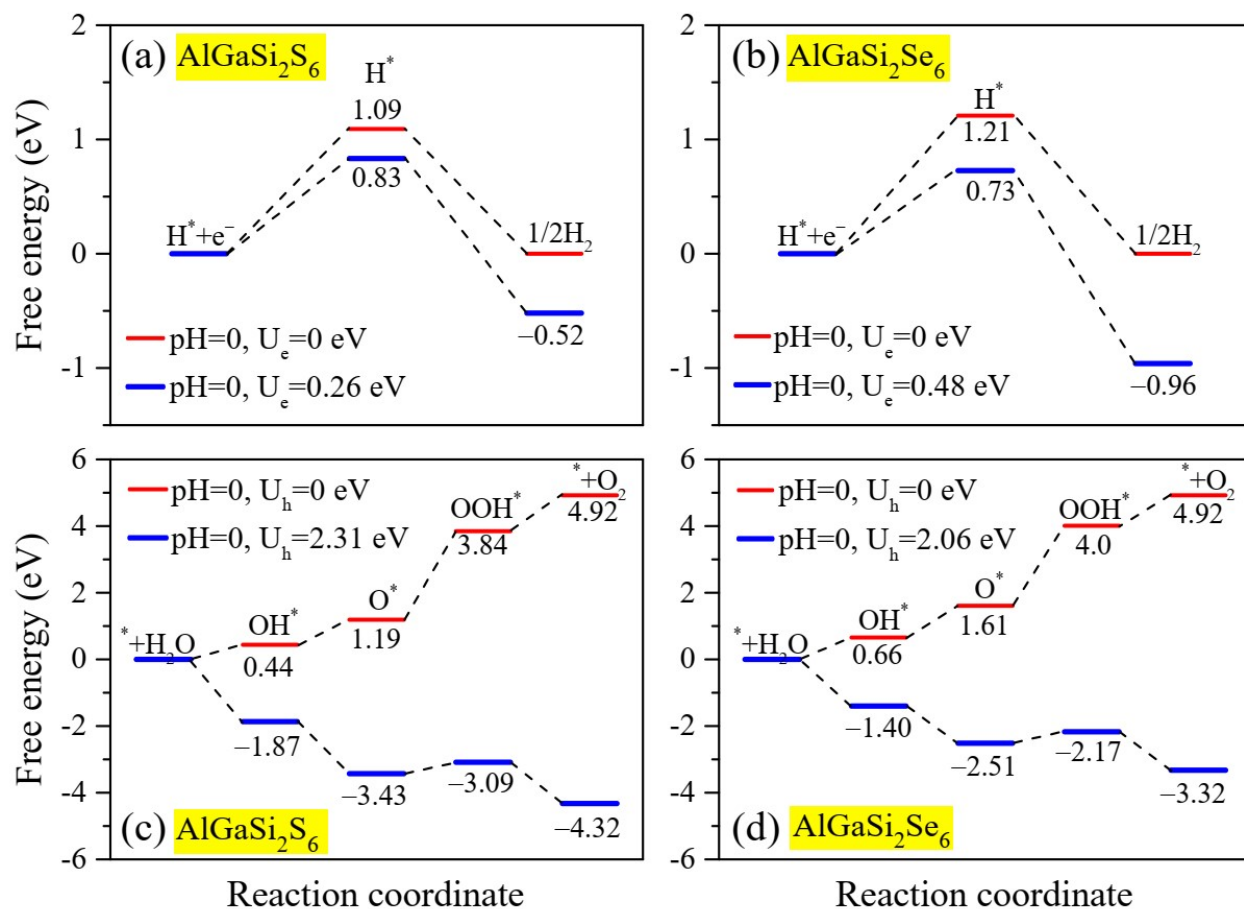

**Figure S1.** Gibbs free-energy diagrams for HER and OER on AlGaSi<sub>2</sub>X<sub>6</sub> (X = S, Se) monolayers under vacuum condition. (a)-(b) HER pathways on AlGaSi<sub>2</sub>S<sub>6</sub> and AlGaSi<sub>2</sub>Se<sub>6</sub>, respectively. Red curves correspond to the equilibrium potential U<sub>e</sub> = 0 V, while blue curves correspond to the electron quasi-Fermi levels at the CBM (U<sub>e</sub> = 0.26 and 0.48 V, respectively). (c)-(d) OER pathways on AlGaSi<sub>2</sub>S<sub>6</sub> and AlGaSi<sub>2</sub>Se<sub>6</sub>, respectively. Red curves are evaluated at U<sub>h</sub> = 0 V, and blue curves at the hole quasi-Fermi levels equal to the VBM (U<sub>h</sub> = 2.31 and 2.06 eV).

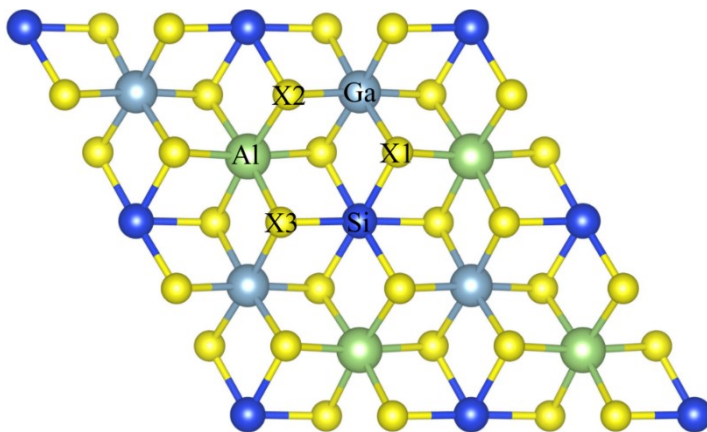

**Figure S2.** Candidate adsorption sites considered for the  $H^*$  intermediate on the  $AlGaSi_2X_6$  monolayer. Al, Ga, Si, X1, X2, and X3 denote the initial adsorption positions used in the adsorption-site screening.

**Table S1.** Corresponding adsorption energies  $E_{ads}$  for the  $H^*$  intermediate at different adsorption sites.

| Site      | $E_{ads}$ (eV) |                |
|-----------|----------------|----------------|
|           | $AlGaSi_2S_6$  | $AlGaSi_2Se_6$ |
| Al        | 2.06           | 1.79           |
| Ga        | 2.23           | 1.28           |
| <b>Si</b> | <b>0.69</b>    | <b>0.80</b>    |
| X1        | 1.02           | 1.03           |
| X2        | 1.08           | 0.90           |
| X3        | 1.06           | 0.90           |

**Optimized pristine AlGaSi<sub>2</sub>S<sub>6</sub>, AlGaSi<sub>2</sub>Se<sub>6</sub>, and AlGaSi<sub>2</sub>Te<sub>6</sub> structures in CONTCAR format.**

AlGaSi<sub>2</sub>S<sub>6</sub>

```
1.0000000000000000
 5.9474768449813338  0.0000000000000000  -0.0000000000000000
-2.9737384224906678  5.1506660361894347  0.0000000000000000
 0.00000000000000017  0.00000000000000030  27.7635467867882433
```

Si        Ga        S        Al

2    1    6    1

Direct

```
0.0000000000000000  0.0000000000000000  0.5400481375662665
0.0000000000000000  0.0000000000000000  0.4599519084337374
0.6666666870000029  0.3333333429999996  0.5000000120000010
0.0065193257314825  0.3550116052130352  0.4434007304485856
0.0065193257314824  0.6515077205184474  0.5565992695514145
0.6449883947869651  0.6515077205184474  0.4434007304485856
0.3484922794815526  0.3550116052130352  0.5565992695514145
0.3484922794815526  0.9934806742685175  0.4434007304485856
0.6449883947869651  0.9934806742685175  0.5565992695514145
0.3333333429999996  0.6666666870000029  0.5000000120000010
```

AlGaSi<sub>2</sub>Se<sub>6</sub>

```
1.0000000000000000
 6.2943128778221418  -0.0000000000000000  0.0000000000000000
```

-3.1471564389110722 5.4510348515802045 0.0000000000000000  
0.00000000000000018 0.00000000000000032 28.7129522803659576

Si Ga Se Al  
2 1 6 1

Direct

0.0000000000000000 0.0000000000000000 0.5392595391280547  
0.0000000000000000 0.0000000000000000 0.4607405068719492  
0.6666666870000029 0.3333333429999996 0.5000000120000010  
0.0059321989523177 0.3572970170739419 0.4419700495999449  
0.0059321989523179 0.6486351818783758 0.5580299504000552  
0.6427029829260579 0.6486351818783758 0.4419700495999449  
0.3513648181216242 0.3572970170739419 0.5580299504000552  
0.3513648181216245 0.9940678010476822 0.4419700495999449  
0.6427029829260578 0.9940678010476822 0.5580299504000552  
0.3333333429999996 0.6666666870000029 0.5000000120000010

AlGaSi2Te6

1.0000000000000000  
6.8476855424346663 -0.00000000000000002 -0.0000000000000000  
-3.4238427712173340 5.9302696368991077 0.00000000000000001  
0.00000000000000020 0.00000000000000036 29.9126920714541811

Si Ga Te Al  
2 1 6 1

Direct

0.0000000000000000 0.0000000000000000 0.5384029979754724  
0.0000000000000000 0.0000000000000000 0.4615970480245313  
0.6666666870000029 0.3333333429999996 0.5000000120000010  
0.0049809587403582 0.3584277956993634 0.4401187153853054  
0.0049809587403570 0.6465531630409941 0.5598812846146943  
0.6415722043006371 0.6465531630409941 0.4401187153853054  
0.3534468369590053 0.3584277956993634 0.5598812846146943  
0.3534468369590048 0.9950190412596424 0.4401187153853054  
0.6415722043006377 0.9950190412596424 0.5598812846146943  
0.3333333429999996 0.6666666870000029 0.5000000120000010

-----  
**Optimized structures of the OH\*, O\*, and OOH\* intermediates on the AlGaSi<sub>2</sub>X<sub>6</sub> in CONTCAR format.**

AlGaSi<sub>2</sub>S<sub>6</sub>-O

1.0000000000000000  
11.8949537277000008 0.0000000000000000 0.0000000000000000  
-5.9474768639000004 10.3013321050000002 0.0000000000000000  
0.0000000000000000 0.0000000000000000 27.7635459900000008

Si Ga S Al O  
8 4 24 4 1

Direct

0.9967675531516272 0.9964627986400614 0.5377919698806727

0.0035372013599390 0.5003047545115663 0.5377919698806727  
0.4996952454884341 0.0032324468483728 0.5377919698806727  
0.5000000000000000 0.5000000000000000 0.5894526393688850  
0.9949955251887491 0.9960378872648921 0.4574135743720895  
0.0039621127351081 0.4989576379238571 0.4574135743720895  
0.5010423620761432 0.0050044748112508 0.4574135743720895  
0.5000000000000000 0.5000000000000000 0.4871048025109310  
0.3232919326898500 0.1622227931566628 0.4940799623827686  
0.3389308774668176 0.6767080823101548 0.4940799623827686  
0.8333333440000033 0.1666666710000015 0.4990356965037819  
0.8377772218433417 0.6610691375331866 0.4940799623827686  
0.9998390014555080 0.1743095432770388 0.4410210632995520  
0.0076566327426239 0.6762690815286582 0.4398060064714338  
0.5041051785568503 0.1824102993727189 0.4413954401150811  
0.5018785405495633 0.6654584240577202 0.4470454904615989  
0.0065965119015800 0.3254733280175220 0.5539487391123996  
0.9994324873791522 0.8209343982571629 0.5528883615362880  
0.5020477330054886 0.3454754457385743 0.5444985227363561  
0.5016803718774393 0.8283707835086273 0.5543783249654198  
0.3345415759422792 0.3364201164918421 0.4470454904615989  
0.3237309184713413 0.8313875512139649 0.4398060064714338  
0.8256904567229618 0.3255294581784688 0.4410210632995520  
0.8175897006272809 0.8216948791841306 0.4413954401150811

0.1716292164913726 0.1733095883688116 0.5543783249654198  
0.1790656017428376 0.6784980891219902 0.5528883615362880  
0.6745266719824784 0.1811231838840582 0.5539487391123996  
0.6545245542614256 0.6565722872669137 0.5444985227363561  
0.1783051208158689 0.4958948214431497 0.4413954401150811  
0.1686124487860349 0.9923433672573755 0.4398060064714338  
0.6635798835081576 0.4981214594504372 0.4470454904615989  
0.6744705418215308 0.0001609985444924 0.4410210632995520  
0.3434277127330858 0.4979522669945117 0.5444985227363561  
0.3215019108780104 0.0005675126208478 0.5528883615362880  
0.8266904116311881 0.4983196281225610 0.5543783249654198  
0.8188768161159422 0.9934034880984204 0.5539487391123996  
0.1651272399773994 0.3254897053224492 0.4964015965607221  
0.1666666710000015 0.8333333440000033 0.4977621552894979  
0.6745103096775560 0.3396375516549547 0.4964015965607221  
0.6603624633450493 0.8348727750226052 0.4964015965607221  
0.5000000000000000 0.5000000000000000 0.6446378306437818

AlGaSi2S6-OH

1.0000000000000000

11.8949537277000008 0.0000000000000000 0.0000000000000000

-5.9474768639000004 10.3013321050000002 0.0000000000000000

0.0000000000000000 0.0000000000000000 27.7635459900000008

| Si | Ga | S  | Al | O | H |
|----|----|----|----|---|---|
| 8  | 4  | 24 | 4  | 1 | 1 |

Direct

|                    |                    |                    |
|--------------------|--------------------|--------------------|
| 0.9985991979825907 | 0.9985478679259507 | 0.5374877984377294 |
| 0.9997981560455329 | 0.4994209468516493 | 0.5374053171827943 |
| 0.4991854727360594 | 0.9997290172139882 | 0.5373895929169973 |
| 0.5010850352429607 | 0.5011124002439108 | 0.5662803624882413 |
| 0.9981669387841344 | 0.9983411188259517 | 0.4571318835082967 |
| 0.0000817921440839 | 0.4992271337599207 | 0.4570720249710061 |
| 0.4994177636010135 | 0.0001868977154479 | 0.4570470696038377 |
| 0.4990489177103390 | 0.4991028231144504 | 0.4725756360313444 |
| 0.3300734765213941 | 0.1643095688019608 | 0.4967015547890092 |
| 0.3333672850197004 | 0.6689592816567805 | 0.4970383807230365 |
| 0.8326481279145556 | 0.1659321810188835 | 0.4970689017529312 |
| 0.8343661635982268 | 0.6646781555964774 | 0.4972146130512113 |
| 0.0027838565341527 | 0.1765064064620240 | 0.4406067667320310 |
| 0.0023831958113367 | 0.6763238922943356 | 0.4405807094749039 |
| 0.5026972085661721 | 0.1776627884122122 | 0.4407646334159433 |
| 0.5023484609174182 | 0.6703554342121980 | 0.4459071570829922 |
| 0.0023499842256132 | 0.3247779437237795 | 0.5534584279901013 |
| 0.0029649207559673 | 0.8248012071601243 | 0.5535052247031209 |
| 0.5015802101408416 | 0.3217234061326684 | 0.5512486264914273 |
| 0.5019867719203290 | 0.8256442798342527 | 0.5542319864402752 |

0.3281749293599002 0.3314087170372032 0.4455295678377801  
0.3221621320427003 0.8255626494735061 0.4405120040206540  
0.8219647629995904 0.3255105274839731 0.4406395760774122  
0.8206630453849143 0.8238669000453624 0.4411173130648982  
0.1727160654249068 0.1757471584525499 0.5540432054948051  
0.1737102446631641 0.6774429845613088 0.5534603031882734  
0.6740508223058846 0.1767290301585544 0.5535146124770509  
0.6778434847426831 0.6809533308519720 0.5518724876323242  
0.1744473810346544 0.4962583717401464 0.4408199280806809  
0.1728538721744086 0.9959314305042666 0.4405004744341882  
0.6671880518662945 0.4961067045996176 0.4459062136815183  
0.6730203047494064 0.9955593643330745 0.4406713571340936  
0.3188156545914944 0.4956610722612028 0.5512941042448762  
0.3213631379557277 0.9960572389029987 0.5533406976108897  
0.8225922004246298 0.4960265221846579 0.5542444259352564  
0.8217555847381659 0.9967244782459712 0.5535605793449678  
0.1645076747410398 0.3305999948680886 0.4971300529159828  
0.1658901530636077 0.8326877548131788 0.4969839048262230  
0.6681868339266533 0.3330277771924090 0.4973702760854530  
0.6650613582381388 0.8341357704165456 0.4974993619961898  
0.5092047328940164 0.5091603701338334 0.6259518187468961  
0.4388946965056197 0.4374991607826342 0.6433213473823791

AlGaSi2S6-OOH

Generated by VASPKIT code

1.0000000000000000

11.8949537277000008 0.0000000000000000 0.0000000000000000

-5.9474768639000004 10.3013321050000002 0.0000000000000000

0.0000000000000000 0.0000000000000000 27.7635459900000008

Si Ga S Al O H

8 4 24 4 2 1

Direct

0.9980988243553223 0.9995502515767486 0.5369417064492285

0.9985922449161859 0.5000665465500724 0.5369960244822536

0.4982904964245846 0.0000751787452611 0.5370714751168653

0.5003429392443967 0.5015603332245012 0.5625975335972558

0.9976053788798986 0.9991399718316184 0.4566338108759095

0.9990948654548191 0.4998350426845085 0.4566759068725874

0.4984753839667422 0.0007725201425530 0.4567308409974924

0.4986953299138423 0.4999386553241939 0.4707470043798493

0.3293132942601481 0.1650469598712856 0.4970223157913160

0.3321205301973003 0.6691717511840533 0.4966614563331345

0.8315757737327313 0.1666304661802762 0.4966946971926025

0.8341918847738878 0.6660346135012251 0.4967913285952429

0.0018003145389670 0.1772028465041733 0.4401792961003175

0.0018441530303838 0.6771936921301864 0.4401850754650689

0.5014279520922318 0.1780884844189143 0.4405520787581443  
0.5017321844775209 0.6714952568756553 0.4451804925437804  
0.0009360133336964 0.3253845800076318 0.5531675343888794  
0.0025740200545566 0.8258425976535362 0.5530731817624142  
0.5007613695567300 0.3215516914014794 0.5513145645166093  
0.5012862901326279 0.8258519365940770 0.5537048353558911  
0.3270817332562561 0.3316504216322457 0.4450961146871177  
0.3212354009830151 0.8260873543623305 0.4401991885922754  
0.8209570428629351 0.3260476407352856 0.4403157904132922  
0.8202342110681154 0.8248187442417014 0.4404382595065613  
0.1716551026588657 0.1764937995354200 0.5538535483782122  
0.1725999781588725 0.6779323465970351 0.5531007696813076  
0.6731869317166326 0.1770791937208083 0.5531663548304793  
0.6788509126510777 0.6830345422740660 0.5513733547967682  
0.1733491645444265 0.4966379306269648 0.4404244519158145  
0.1725415337954137 0.9969918467895834 0.4402495609052425  
0.6670886730389362 0.4969444133159115 0.4450912013648881  
0.6722108560814501 0.9964870618273303 0.4402216100927055  
0.3167674306742543 0.4956627896693745 0.5508677585704640  
0.3204998707110627 0.9961882527496010 0.5532275181488555  
0.8214682963581824 0.4968569353706144 0.5537896960679735  
0.8212158827931370 0.9978483778266274 0.5530379329898156  
0.1630684391740450 0.3307819855710460 0.4968617081686090

0.1653386167169382 0.8336627655759582 0.4966690053613392  
0.6666836816964633 0.3335187354725655 0.4971054690931739  
0.6650095399409780 0.8352926049542362 0.4969734255144052  
0.5143736543763693 0.5196932694275146 0.6235942065396859  
0.4024448539861374 0.4030178881251633 0.6447788488709111  
0.3433790094198810 0.4368377831966854 0.6506433459352865

AlGaSi2Se6-O

1.0000000000000000

12.5886259078999991 0.0000000000000000 0.0000000000000000

-6.2943129538999996 10.9020698350000007 0.0000000000000000

0.0000000000000000 0.0000000000000000 28.7129516602000017

Si Ga Se Al O

8 4 24 4 1

Direct

0.9962910341156028 0.9960134467076386 0.5368210326526555

0.0039865532923620 0.5002775874079642 0.5368210326526555

0.4997224125920352 0.0037089658843975 0.5368210326526555

0.5000000000000000 0.5000000000000000 0.5922020170285096

0.9943842678142514 0.9956606451518236 0.4580155617582790

0.0043393548481774 0.4987236226624293 0.4580155617582790

0.5012763773375712 0.0056157321857481 0.4580155617582790

0.5000000000000000 0.5000000000000000 0.4886684836648555

0.3214932048891357 0.1617042927968814 0.4933923893797215  
0.3402111049077506 0.6785068101108692 0.4933923893797215  
0.8333333440000033 0.1666666710000015 0.4991101402518940  
0.8382957222031234 0.6597889100922542 0.4933923893797215  
0.9987365503050576 0.1749134336042111 0.4394527638374894  
0.0080500486451923 0.6769808153455821 0.4378828390183576  
0.5037076328707017 0.1842573881691086 0.4399795562216788  
0.5014527290307060 0.6653836644047552 0.4447359848763171  
0.0062252423119033 0.3238409490743057 0.5551755321485812  
0.9985237342797271 0.8187801093422310 0.5538234880738030  
0.5014898761916178 0.3428309390512508 0.5462470132208010  
0.5010265216347213 0.8269929844133811 0.5557041408613499  
0.3346163355952452 0.3360690656259546 0.4447359848763171  
0.3230191846544181 0.8310692342996134 0.4378828390183576  
0.8250865663957888 0.3238231177008507 0.4394527638374894  
0.8157426118308918 0.8194502457015961 0.4399795562216788  
0.1730070155866188 0.1740335382213434 0.5557041408613499  
0.1812198906577689 0.6797436259374995 0.5538234880738030  
0.6761590509256951 0.1823842942376014 0.5551755321485812  
0.6571690609487496 0.6586589381403712 0.5462470132208010  
0.1805497542984033 0.4962923671292984 0.4399795562216788  
0.1689307657003861 0.9919499513548082 0.4378828390183576  
0.6639309343740452 0.4985472709692941 0.4447359848763171

0.6761768822991491 0.0012634496949412 0.4394527638374894  
0.3413410618596294 0.4985101238083819 0.5462470132208010  
0.3202563740625005 0.0014762657202727 0.5538234880738030  
0.8259664617786567 0.4989734783652790 0.5557041408613499  
0.8176157057623983 0.9937747576880961 0.5551755321485812  
0.1649105645646629 0.3243163071800700 0.4960423841303477  
0.1666666710000015 0.8333333440000033 0.4974948769458067  
0.6756837078199350 0.3405942743845978 0.4960423841303477  
0.6594057406154065 0.8350894504353414 0.4960423841303477  
0.5000000000000000 0.5000000000000000 0.6457067035707850

AlGaSi2Se6-OH

1.0000000000000000

12.5886259078999991 0.0000000000000000 0.0000000000000000

-6.2943129538999996 10.9020698350000007 0.0000000000000000

0.0000000000000000 0.0000000000000000 28.7129516602000017

Si Ga Se Al O H

8 4 24 4 1 1

Direct

0.9989325217207148 0.9987401627759180 0.5367632869556139

0.9998337648615176 0.4997538920079575 0.5366452811394262

0.4992518573102889 0.9996140729269191 0.5366258938205499

0.5015285752714174 0.5015625665054795 0.5664798571258608

0.9983857848778767 0.9984984045342971 0.4580254608231907  
0.0001506304731241 0.4995020380059080 0.4579239578976935  
0.4995609542499646 0.0002048742253074 0.4579001209852092  
0.4990285292688184 0.4991060153453412 0.4754237137251454  
0.3301237793895066 0.1648757601261235 0.4966845384976277  
0.3338355123874904 0.6693146755224336 0.4970026237209463  
0.8329084630388417 0.1660953892224623 0.4970171983862687  
0.8339930084104541 0.6643923607319391 0.4973860946685272  
0.0024633890012425 0.1776462435385695 0.4392445455832487  
0.0016287467578767 0.6773326526283796 0.4391683300486321  
0.5024202128444738 0.1788629794333244 0.4393725856677841  
0.5022863228510497 0.6705816843769703 0.4447938364653894  
0.0018740005498489 0.3237656941359172 0.5549469364286204  
0.0028988798020575 0.8235595067362464 0.5548911116020372  
0.5011079061000983 0.3183788372880674 0.5535775920837319  
0.5014764214320512 0.8240676512079489 0.5559530567994040  
0.3282906169184374 0.3312195677141082 0.4442512739448408  
0.3213785140486518 0.8242070552461427 0.4390323668288353  
0.8211575042265359 0.3241405252819423 0.4392629752568427  
0.8196757712516869 0.8224091898726336 0.4397801167585158  
0.1743954577251749 0.1769630747343640 0.5556690019698481  
0.1751886905080593 0.6787363813313373 0.5547996510180341  
0.6757477610838375 0.1772952851919985 0.5549636643901894

0.6818217691687326 0.6844852573510657 0.5545122957005184  
 0.1761102328618823 0.4968993130518579 0.4394311941005758  
 0.1745776325252409 0.9968085264373416 0.4390575894108367  
 0.6677087364848769 0.4966647883652824 0.4448122378190595  
 0.6746015300211977 0.9959835142129000 0.4393240948257329  
 0.3160168586654253 0.4960636451607180 0.5536310042822591  
 0.3206845426663397 0.9967718837601112 0.5547167415159513  
 0.8215313154828170 0.4964826271619090 0.5559920963964727  
 0.8213991005140338 0.9979034388516624 0.5550448507336062  
 0.1646906335485254 0.3306181310422189 0.4972206549611062  
 0.1660431952510692 0.8329229966253519 0.4968388789331424  
 0.6685161395641065 0.3331590453362183 0.4974690596194306  
 0.6651361051852712 0.8342030184884511 0.4977389033588498  
 0.5092702188607999 0.5091539414438544 0.6245575058599170  
 0.4423684648385741 0.4410534000630685 0.6410680998905156

AlGaSi2Se6-OOH

1.0000000000000000

12.5886259078999991 0.0000000000000000 0.0000000000000000

-6.2943129538999996 10.9020698350000007 0.0000000000000000

0.0000000000000000 0.0000000000000000 28.7129516602000017

Si Ga Se Al O H

8 4 24 4 2 1

Direct

0.0012330651718663 0.9990476474299894 0.5365679101925824  
0.0014735280425828 0.4997834793769213 0.5367556933249974  
0.5012571358115123 0.9992613072252275 0.5367247731745453  
0.5036177882626555 0.5012703474528042 0.5625769967409963  
0.0007742759765624 0.9986835341311503 0.4578566248202270  
0.0020358230206327 0.4994479022683122 0.4580525071876021  
0.5014172400043709 0.0000430653289254 0.4580072514488190  
0.5018893573327224 0.4997093996857150 0.4738116117181304  
0.3325686516130432 0.1652313708067134 0.4976959134951951  
0.3352917188613288 0.6686108909474531 0.4972848811164507  
0.8347255182683931 0.1661938949084179 0.4970330712877183  
0.8366894492615682 0.6648842883417742 0.4971385556752386  
0.0045870498242796 0.1778793876248423 0.4393046176481585  
0.0041586191207110 0.6775980155857637 0.4391675350335573  
0.5038807310866631 0.1785464696736092 0.4396195517042106  
0.5042115023233807 0.6711582691518104 0.4443670168593953  
0.0031864295069842 0.3237382704244094 0.5552306809593258  
0.0051315102818022 0.8238746012293778 0.5548237969125359  
0.5031572581770501 0.3175584268896875 0.5542418437952695  
0.5038349939999583 0.8236681296838488 0.5558275444267803  
0.3299059167848548 0.3306949807912707 0.4445096351111550  
0.3232477226034925 0.8239042266661589 0.4392523137130101

0.8229731178325979 0.3241062880534708 0.4394443483137895  
0.8222443307128453 0.8228003055728964 0.4393482317939252  
0.1760173140536886 0.1767872478598468 0.5561884946901666  
0.1767847315707400 0.6787296379471840 0.5549912689659489  
0.6777337725046331 0.1769083309197530 0.5550777019445107  
0.6857401321078128 0.6858484101212446 0.5540590158732668  
0.1778551274719937 0.4964891605199436 0.4396366051277735  
0.1774470967207228 0.9975212015991862 0.4393398600100505  
0.6704380829554285 0.4965445324348243 0.4442230943047989  
0.6766546428361334 0.9963721764223017 0.4391992606096976  
0.3167831186269824 0.4953758862242255 0.5538082515936854  
0.3227791115662560 0.9961275402573344 0.5551567747369260  
0.8232333253009475 0.4967878419041770 0.5559504105316138  
0.8236395314601933 0.9983513597388564 0.5548071521355078  
0.1660387102481139 0.3301024571468401 0.4976708199240176  
0.1683644759311631 0.8333533753935962 0.4970021227828251  
0.6695331702948125 0.3328905643266645 0.4977451788381527  
0.6679493435616398 0.8347556989148691 0.4974247549971443  
0.5200613239868178 0.5207004083687142 0.6218401439273493  
0.4165632094883071 0.4124374344074613 0.6446635294822552  
0.3628910974317458 0.4462223042424689 0.6515729330706844

## References

- [1] J. K. Norskov, T. Bligaard, A. Logadottir, J. Kitchin, J. G. Chen, S. Pandelov, J. Norskov, Trends in the exchange current for hydrogen evolution, *J. Electrochem. Soc.* 152 (3) (2005) J23–J26.
- [2] C. Quan, S. Ji, R. Yao, W. Liu, J. Yang, X. Li, Two-dimensional janus AgBiP<sub>2</sub>X<sub>3</sub>X<sub>3</sub>' (X, X' = S, Se, Te): Efficient intrinsic electric field regulatory strategy for photocatalytic overall water-splitting, *Int. J. Hydrog. Energy* 56 (2024) 1227–1234.
- [3] T. V. Vu, N. N. Hieu, D. D. Vo, A. Kartamyshev, H. D. Tong, T. T. Trinh, V. Khuong Dien, Z. Haman, P. Dey, N. Khossossi, 2D Ge<sub>2</sub>Se<sub>2</sub>P<sub>4</sub> monolayer: A versatile photocatalyst for sustainable water splitting, *J. Phys. Chem. C* 128 (10) (2024) 4245–4257.
- [4] E. Skúlason, T. Bligaard, S. Gudmundsdóttir, F. Studt, J. Rossmeisl, F. Abild-Pedersen, T. Vegge, H. Jónsson, J.K. Nørskov, A theoretical evaluation of possible transition metal electro-catalysts for N<sub>2</sub> reduction, *Phys. Chem. Chem. Phys.*, 14 (2012), 1235-1245.
- [5] P. D. Trung, H. D. Tong, First-principles study of Ga<sub>2</sub>Ge<sub>2</sub>S<sub>3</sub>Se<sub>3</sub> monolayer: a promising photocatalyst for water splitting, *RSC Adv.* 15 (2025) 8060–8071.
- [6] C.-F. Fu, J. Sun, Q. Luo, X. Li, W. Hu, J. Yang, Intrinsic electric fields in two-dimensional materials boost the solar-to-hydrogen efficiency for photocatalytic water splitting, *Nano Lett.* 18 (10) (2018) 6312–6317.
